# Supplementary material for: Controversy and Consensus on the Management of Elevated Sperm DNA Fragmentation in Male Infertility: A Global Survey, Current Guidelines, and Expert Recommendations
Source: PubMed Central journal article supplement — World J Mens Health. 2023 Apr 20;41(4):809–47. doi: 10.5534/wjmh.230008 (PMC10523126; doi:10.5534/wjmh.230008), 2023-04-20

## Supplement File 2. Advanced analysis of selected questions on the management of elevated SDF

### Q33: How do you treat elevated SDF once diagnosed in infertile men? [Select all that apply]

Advanced Analysis Question 33: To compare based on cost of SDF testing: less than \$100 vs. more than \$100, particularly “repeat testing and confirm elevated SDF”: (not significant)

| Cost                                                                                          | Less than 100\$ | More than 100\$ | p-value |
|-----------------------------------------------------------------------------------------------|-----------------|-----------------|---------|
| How do you treat elevated SDF once diagnosed in infertile men? [Select all that apply] (Q 33) |                 |                 | 0.6 F   |
| Recommend lifestyle changes (smoking cessation, weight loss, etc.)                            | 153 (28.54)     | 160 (28.37)     |         |
| Prescribe empiric antioxidants                                                                | 153 (28.54)     | 152 (26.95)     |         |
| Recommend reduced ejaculatory abstinence                                                      | 72 (13.43)      | 79 (14.01)      |         |
| Prescribe empiric antibiotics (without culture)                                               | 15 (2.8)        | 12 (2.13)       |         |
| Repeat testing and confirm elevated SDF                                                       | 38 (7.09)       | 28 (4.96)       |         |
| Refer directly for ART with ejaculated sperm                                                  | 10 (1.87)       | 16 (2.84)       |         |
| Refer directly for ICSI with testicular sperm                                                 | 30 (5.6)        | 36 (6.38)       |         |
| Not applicable                                                                                | 14 (2.61)       | 19 (3.37)       |         |
| Refer directly for ART with advanced sperm selection techniques                               | 34 (6.34)       | 48 (8.51)       |         |
| Prescribe empiric hormonal therapy                                                            | 17 (3.17)       | 14 (2.48)       |         |

How do you treat elevated SDF once diagnosed in infertile men? [Select all that apply] (Q 33)

p-value: 0.6 F

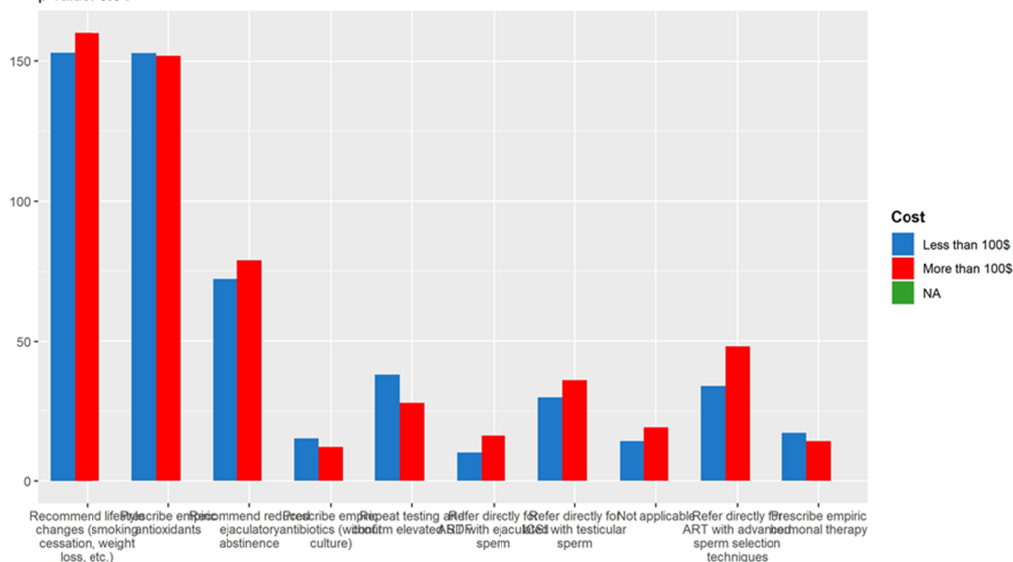

| Cost                                    | Less than 100\$ | More than 100\$ | p-value |
|-----------------------------------------|-----------------|-----------------|---------|
| Repeat testing and confirm elevated SDF |                 |                 | 0.2     |
| Not chosen                              | 171 (81.82)     | 189 (87.1)      |         |
| Chosen                                  | 38 (18.18)      | 28 (12.9)       |         |

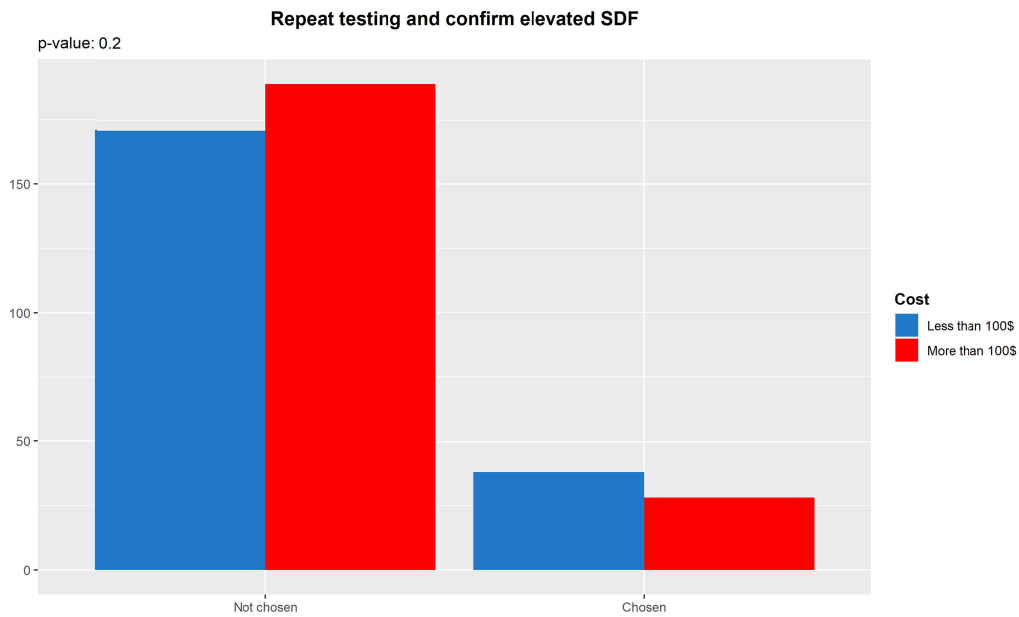



**Q38: At which point would you refer a couple with natural RPL and high SDF in the man for ART, given there is no female factor infertility and the woman is under 35 years old?**

Advanced Analysis Question 38: comparing the results between urologists/andrologists and other specialties: (significant!!)

| Specialty                                                                                                                                                                         | Urology/andrology | Others     | p-value |
|-----------------------------------------------------------------------------------------------------------------------------------------------------------------------------------|-------------------|------------|---------|
| At which point would you refer a couple with natural RPL and high SDF in the man for ART, given there is no female factor infertility and the woman is under 35 years old? (Q 38) |                   |            | <0.001  |
| Immediately after diagnosis                                                                                                                                                       | 24 (9.64)         | 30 (20)    |         |
| 3 months after failure of empiric medical therapy (e.g.: antioxidants) and conservative measures                                                                                  | 52 (20.88)        | 43 (28.67) |         |
| 6 months after failure of empiric medical therapy (e.g.: antioxidants) and conservative measures                                                                                  | 107 (42.97)       | 29 (19.33) |         |
| More than 6 months after failure of empiric medical therapy (e.g.: antioxidants) and conservative measures                                                                        | 33 (13.25)        | 14 (9.33)  |         |
| I do not refer men with RPL and elevated SDF for ART                                                                                                                              | 10 (4.02)         | 13 (8.67)  |         |
| Not applicable                                                                                                                                                                    | 23 (9.24)         | 21 (14)    |         |

**At which point would you refer a couple with natural RPL and high SDF in the man for ART, given there is no female factor infertility and the woman is under 35 years old? (Q 38)**

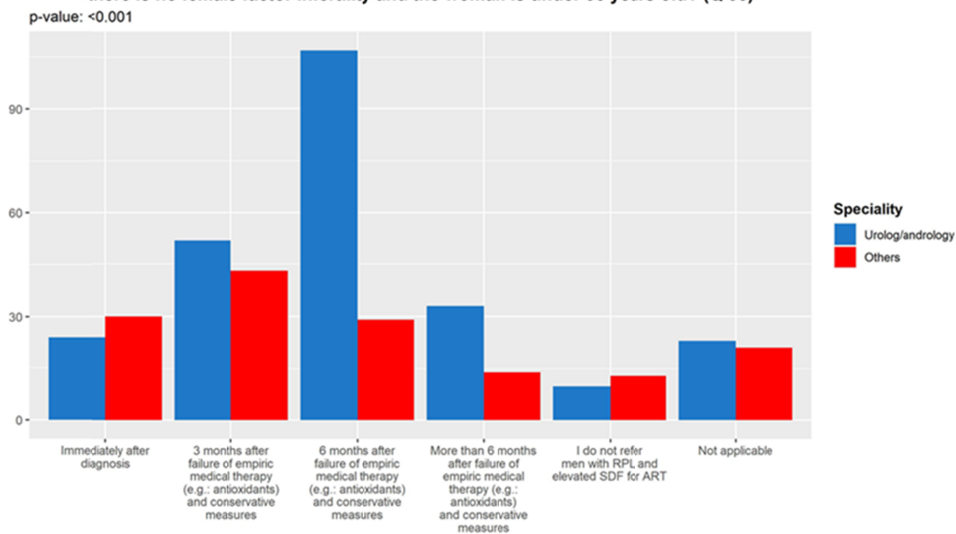

**Q40: At which point do you perform varicocele repair for a man with clinical varicocele, normal semen parameters, and elevated SDF?**

Advanced Analysis Question 40: comparing the results between fellowship-trained reproductive urologists and general urologists: (not significant)

| Training                                                                                                                              | Fellowship-trained reproductive urology | General urology | p-value |
|---------------------------------------------------------------------------------------------------------------------------------------|-----------------------------------------|-----------------|---------|
| At which point do you perform varicocele repair for a man with clinical varicocele, normal semen parameters, and elevated SDF? (Q 40) |                                         |                 | 0.5 F   |
| Immediately after diagnosis                                                                                                           | 33 (45.83)                              | 35 (38.04)      |         |
| 3 months after failure of empiric medical therapy (e.g.: antioxidants) and conservative measures                                      | 6 (8.33)                                | 14 (15.22)      |         |
| 6 months after failure of empiric medical therapy (e.g.: antioxidants) and conservative measures                                      | 15 (20.83)                              | 21 (22.83)      |         |
| More than 6 months after failure of empiric medical therapy (e.g.: antioxidants) and conservative measures                            | 5 (6.94)                                | 4 (4.35)        |         |
| After failure of ART and no female factor                                                                                             | 8 (11.11)                               | 6 (6.52)        |         |
| I do not perform varicocele repair for men with clinical varicocele, normal semen parameters, and elevated SDF                        | 3 (4.17)                                | 6 (6.52)        |         |
| Not applicable                                                                                                                        | 2 (2.78)                                | 6 (6.52)        |         |

**At which point do you perform varicocele repair for a man with clinical varicocele, normal semen parameters, and elevated SDF? (Q 40)**

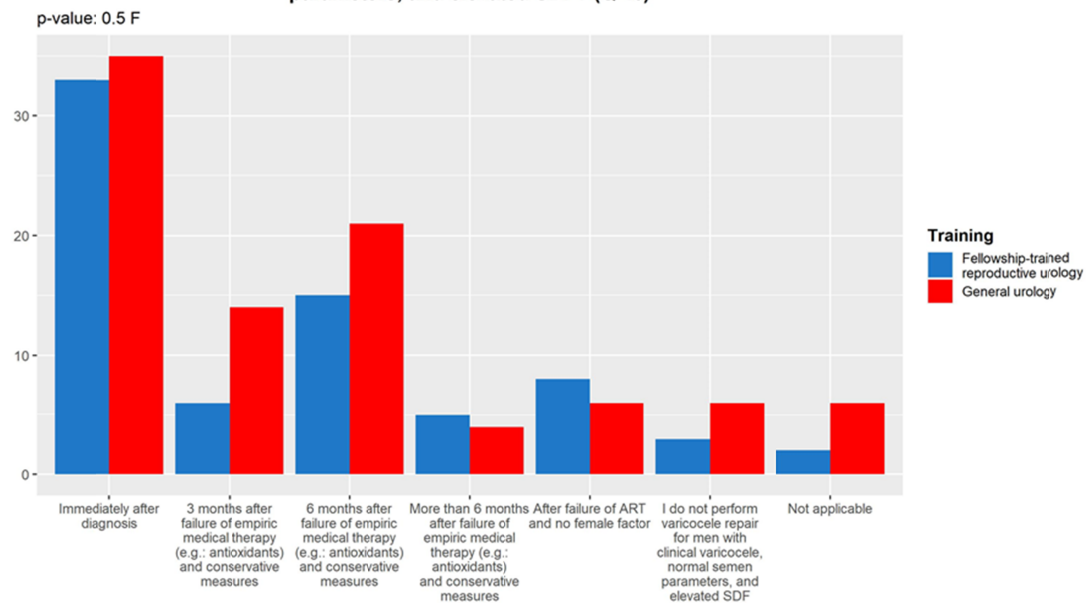

**Q42: During the evaluation of an infertile man, he is found to have elevated SDF as well as subclinical varicocele, would you offer varicocele repair for this patient?**

Advanced Analysis Question 42: comparing the results between fellowship-trained reproductive urologists and general urologists: (not significant)

| Training                                                                                                                                                                  | Fellowship-trained reproductive urology | General urology | p-value |
|---------------------------------------------------------------------------------------------------------------------------------------------------------------------------|-----------------------------------------|-----------------|---------|
| During the evaluation of an infertile man, he is found to have elevated SDF as well as subclinical varicocele, would you offer varicocele repair for this patient? (Q 42) |                                         |                 | 0.2 F   |
| No, I do not repair subclinical varicocele                                                                                                                                | 38 (51.35)                              | 32 (34.78)      |         |
| Not applicable                                                                                                                                                            | 3 (4.05)                                | 4 (4.35)        |         |
| Yes, in all such cases                                                                                                                                                    | 8 (10.81)                               | 12 (13.04)      |         |
| Yes, only if ART is planned                                                                                                                                               | 4 (5.41)                                | 4 (4.35)        |         |
| Yes, only if there are no other underlying causes and risks for elevated SDF                                                                                              | 21 (28.38)                              | 40 (43.48)      |         |

**During the evaluation of an infertile man, he is found to have elevated SDF as well as subclinical varicocele, would you offer varicocele repair for this patient? (Q 42)**

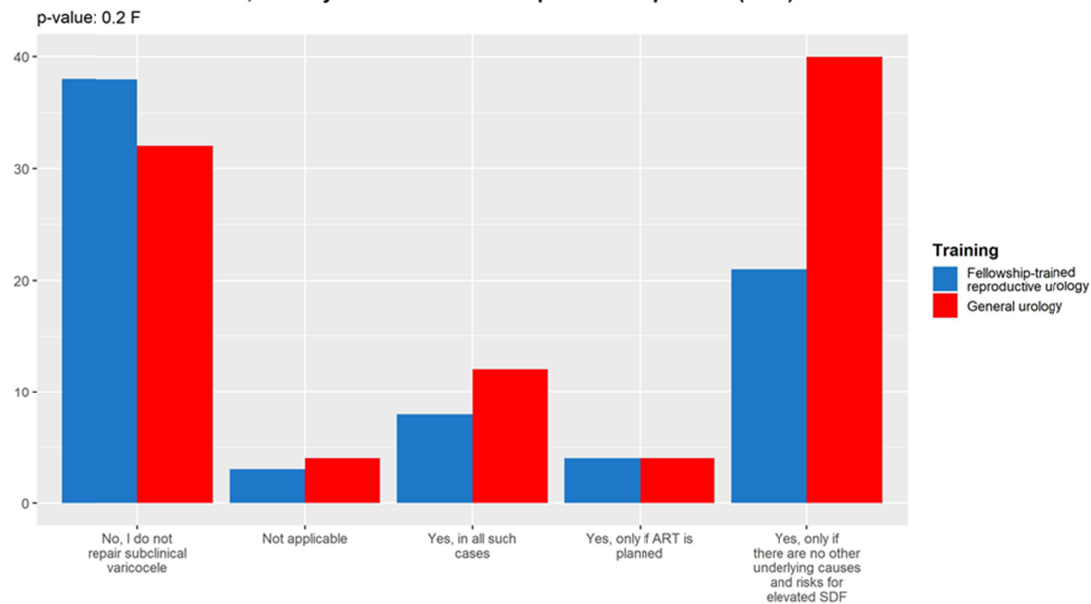

**Q51: In a couple with a normal female partner experiencing failure to achieve a clinical pregnancy after IUI, associated with elevated SDF in the male partner, what would your management strategy be?**

Advanced Analysis Question 51: comparing the results between urologists/andrologists and other specialties: (significant!!)

| Speciality                                                                                                                                                                                                | Urology/<br>andrology | Others     | p-value |
|-----------------------------------------------------------------------------------------------------------------------------------------------------------------------------------------------------------|-----------------------|------------|---------|
| In a couple with a normal female partner experiencing failure to achieve a clinical pregnancy after IUI, associated with elevated SDF in the male partner, what would your management strategy be? (Q 51) |                       |            | 0.01 F  |
| Repeat the procedure with no additional intervention                                                                                                                                                      | 5 (1.99)              | 6 (4.11)   |         |
| Repeat the procedure after applying conservative measures (shorter abstinence, antioxidants)                                                                                                              | 94 (37.45)            | 39 (26.71) |         |
| Repeat IUI using techniques to select sperm with lower SDF                                                                                                                                                | 29 (11.55)            | 15 (10.27) |         |
| Refer for ICSI with ejaculated sperm                                                                                                                                                                      | 29 (11.55)            | 33 (22.6)  |         |
| Refer for ICSI using techniques to select sperm with lower SDF                                                                                                                                            | 44 (17.53)            | 24 (16.44) |         |
| Refer for ICSI using testicular sperm                                                                                                                                                                     | 26 (10.36)            | 8 (5.48)   |         |
| Not applicable                                                                                                                                                                                            | 24 (9.56)             | 21 (14.38) |         |

**In a couple with a normal female partner experiencing failure to achieve a clinical pregnancy after UI, associated with elevated SDF in the male partner, what would your management strategy be? (Q 51)**

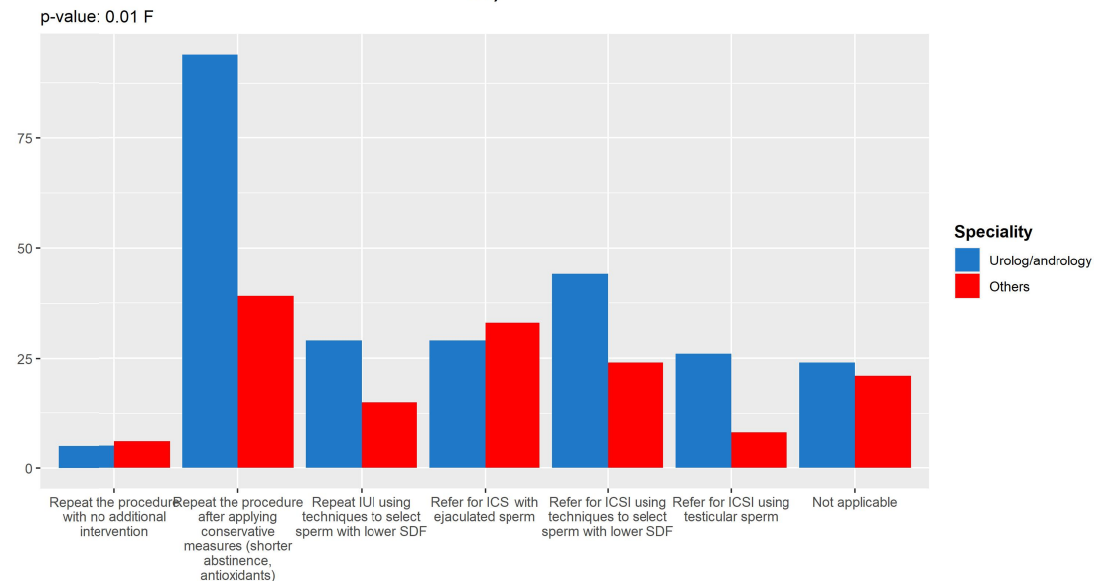

**Q52: In a couple with a normal female partner experiencing miscarriage after IUI, associated with elevated SDF in the male partner, what would your management strategy be?**

Advanced Analysis Question 52: comparing the results between urologists/andrologists and other specialties: (significant!!)

| Specialty                                                                                                                                                                     | Urology/ andrology | Others     | p-value |
|-------------------------------------------------------------------------------------------------------------------------------------------------------------------------------|--------------------|------------|---------|
| In a couple with a normal female partner experiencing miscarriage after IUI, associated with elevated SDF in the male partner, what would your management strategy be? (Q 52) |                    |            | 0.001 F |
| Repeat the procedure with no additional intervention                                                                                                                          | 5 (2)              | 7 (4.73)   |         |
| Repeat the procedure after applying conservative measures (shorter abstinence, antioxidants)                                                                                  | 82 (32.8)          | 33 (22.3)  |         |
| Repeat IUI using techniques to select sperm with lower SDF                                                                                                                    | 32 (12.8)          | 24 (16.22) |         |
| Refer for ICSI with ejaculated sperm                                                                                                                                          | 22 (8.8)           | 24 (16.22) |         |
| Refer for ICSI using techniques to select sperm with lower SDF                                                                                                                | 53 (21.2)          | 33 (22.3)  |         |
| Refer for ICSI using testicular sperm                                                                                                                                         | 32 (12.8)          | 6 (4.05)   |         |
| Not applicable                                                                                                                                                                | 24 (9.6)           | 21 (14.19) |         |

**In a couple with a normal female partner experiencing miscarriage after IUI, associated with elevated SDF in the male partner, what would your management strategy be? (Q 52)**

p-value: 0.001 F

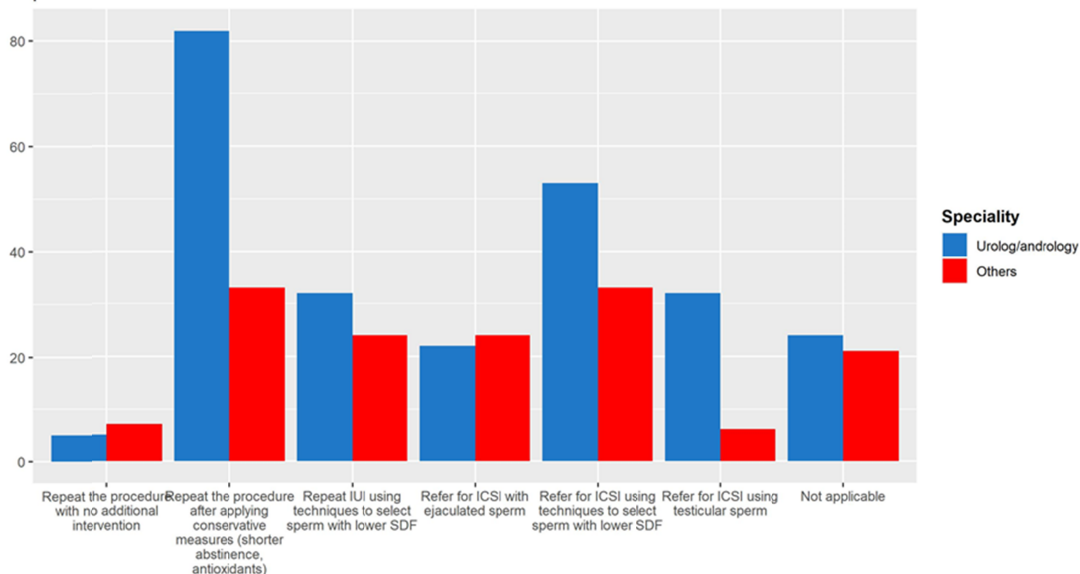

**Q53: In a couple with a normal female partner experiencing fertilization failure after IVF, associated with elevated SDF in the male partner, what would your management strategy be?**

Advanced Analysis Question 53: comparing the results between urologists/andrologists and other specialties: (not significant)

| Speciality                                                                                                                                                                              | Urology/<br>andrology | Others     | p-<br>value |
|-----------------------------------------------------------------------------------------------------------------------------------------------------------------------------------------|-----------------------|------------|-------------|
| In a couple with a normal female partner experiencing fertilization failure after IVF, associated with elevated SDF in the male partner, what would your management strategy be? (Q 53) |                       |            | 0.05 f      |
| Repeat the procedure with no additional intervention                                                                                                                                    | 3 (1.2)               | 2 (1.33)   |             |
| Repeat the procedure after applying conservative measures (shorter abstinence, antioxidants)                                                                                            | 50 (19.92)            | 23 (15.33) |             |
| Repeat IVF using techniques to select sperm with lower SDF                                                                                                                              | 34 (13.55)            | 12 (8)     |             |
| Refer for ICSI with ejaculated sperm                                                                                                                                                    | 32 (12.75)            | 29 (19.33) |             |
| Refer for ICSI using techniques to select sperm with lower SDF                                                                                                                          | 62 (24.7)             | 45 (30)    |             |
| Refer for ICSI using testicular sperm                                                                                                                                                   | 46 (18.33)            | 17 (11.33) |             |
| Not applicable                                                                                                                                                                          | 24 (9.56)             | 22 (14.67) |             |

**In a couple with a normal female partner experiencing fertilization failure after IVF, associated with elevated SDF in the male partner, what would your management strategy be? (Q 53)**

p-value: 0.05 f

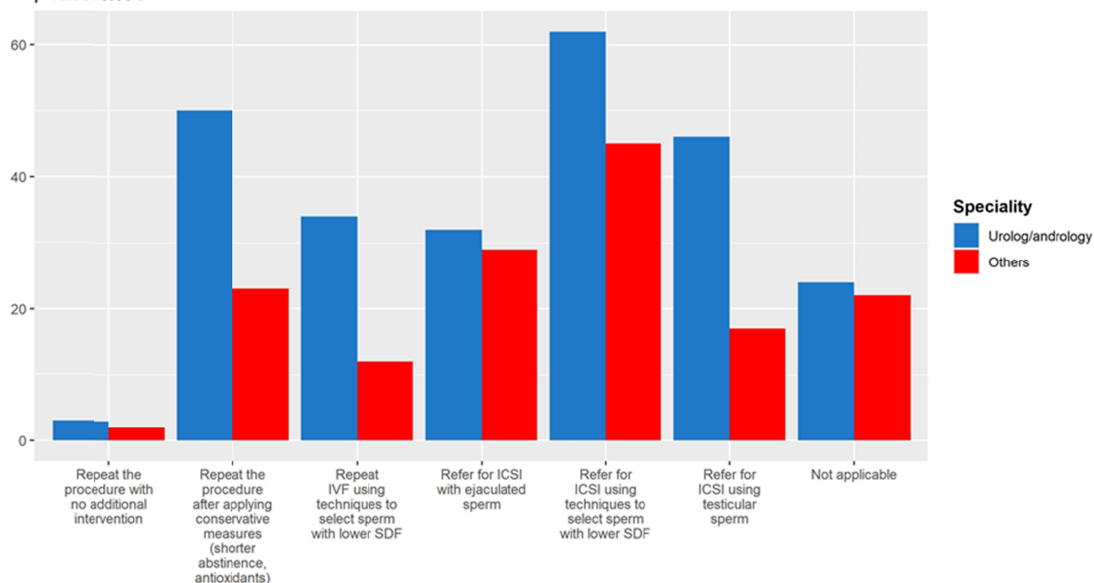

**Q54: In a couple with a normal female partner experiencing failure to achieve a clinical pregnancy after IVF, associated with elevated SDF in the male partner, what would your management strategy be?**

Advanced Analysis Question 54: comparing the results between urologists/andrologists and other specialties: (not significant)

| Speciality                                                                                                                                                                                                | Urology/ andrology | Others     | p-value |
|-----------------------------------------------------------------------------------------------------------------------------------------------------------------------------------------------------------|--------------------|------------|---------|
| In a couple with a normal female partner experiencing failure to achieve a clinical pregnancy after IVF, associated with elevated SDF in the male partner, what would your management strategy be? (Q 54) |                    |            | 0.3 f   |
| Repeat the procedure with no additional intervention                                                                                                                                                      | 3 (1.2)            | 2 (1.33)   |         |
| Repeat the procedure after applying conservative measures (shorter abstinence, antioxidants)                                                                                                              | 50 (19.92)         | 24 (16)    |         |
| Repeat IVF using techniques to select sperm with lower SDF                                                                                                                                                | 30 (11.95)         | 15 (10)    |         |
| Refer for ICSI with ejaculated sperm                                                                                                                                                                      | 26 (10.36)         | 26 (17.33) |         |
| Refer for ICSI using techniques to select sperm with lower SDF                                                                                                                                            | 69 (27.49)         | 39 (26)    |         |
| Refer for ICSI using testicular sperm                                                                                                                                                                     | 50 (19.92)         | 23 (15.33) |         |
| Not applicable                                                                                                                                                                                            | 23 (9.16)          | 21 (14)    |         |

**In a couple with a normal female partner experiencing failure to achieve a clinical pregnancy after IVF, associated with elevated SDF in the male partner, what would your management strategy be? (Q 54)**

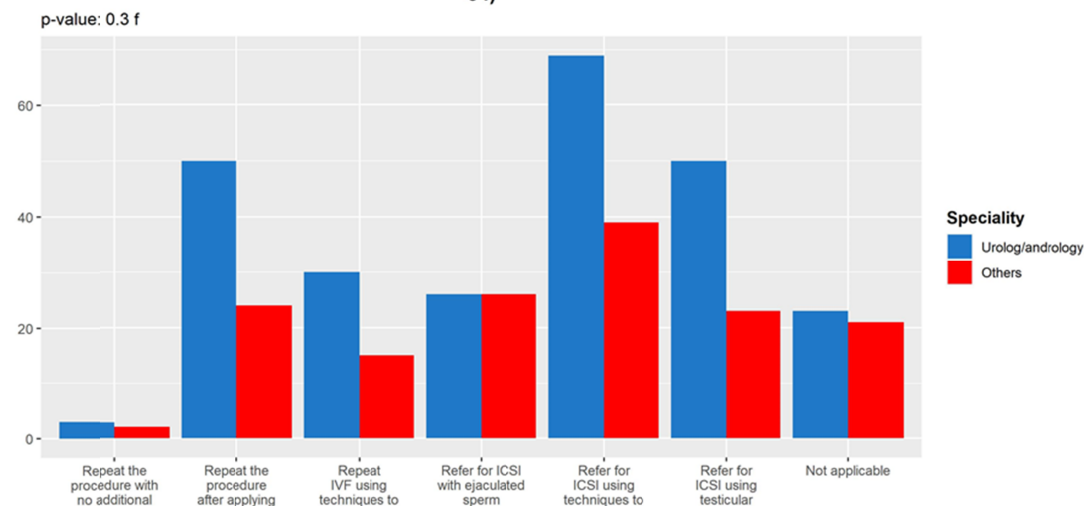

**Q55: In a couple with a normal female partner experiencing miscarriage after IVF or ICSI, associated with elevated SDF in the male partner and no other abnormality, what would your management strategy be?**

Advanced Analysis Question 54: comparing the results between urologists/andrologists and other specialties: (not significant)

| Specialty                                                                                                                                                                                                      | Urology/<br>andrology | Others     | p-<br>value |
|----------------------------------------------------------------------------------------------------------------------------------------------------------------------------------------------------------------|-----------------------|------------|-------------|
| In a couple with a normal female partner experiencing miscarriage after IVF or ICSI, associated with elevated SDF in the male partner and no other abnormality, what would your management strategy be? (Q 55) |                       |            | 0.05 F      |
| Repeat the procedure with no additional intervention                                                                                                                                                           | 5 (1.99)              | 6 (4.03)   |             |
| Repeat the procedure after applying conservative measures (shorter abstinence, antioxidants)                                                                                                                   | 58 (23.11)            | 34 (22.82) |             |
| Repeat IVF or ICSI using techniques to select sperm with lower SDF                                                                                                                                             | 74 (29.48)            | 54 (36.24) |             |
| Refer for ICSI using testicular sperm                                                                                                                                                                          | 86 (34.26)            | 32 (21.48) |             |
| Transfer to another center                                                                                                                                                                                     | 4 (1.59)              | 1 (0.67)   |             |
| Not applicable                                                                                                                                                                                                 | 24 (9.56)             | 22 (14.77) |             |

**In a couple with a normal female partner experiencing miscarriage after IVF or ICSI, associated with elevated SDF in the male partner and no other abnormality, what would your management strategy be? (Q 55)**

p-value: 0.05 F

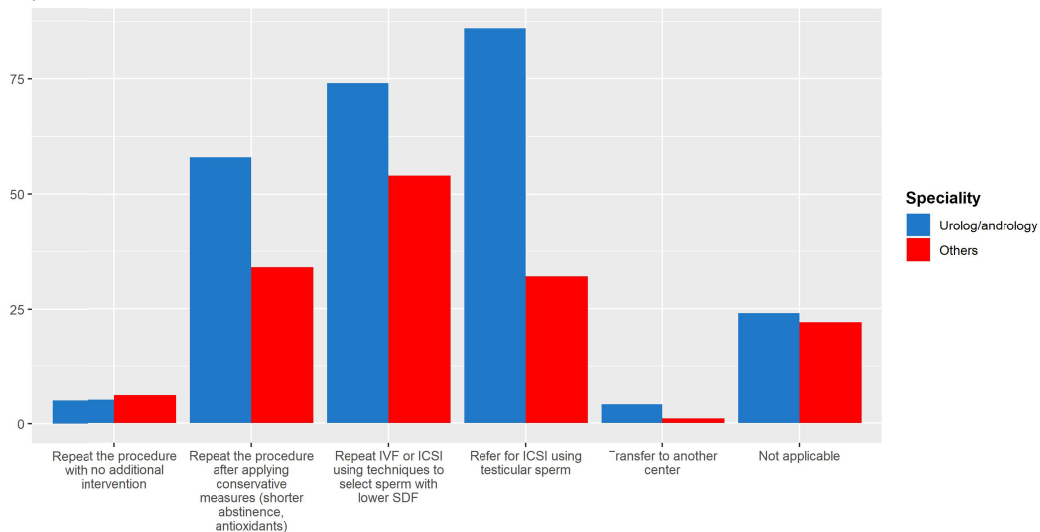

Supplement: wjmh-41-809-s002.pdf [file wjmh-41-809-s002.pdf]
