# Supplementary material for: Controversy and Consensus on the Management of Elevated Sperm DNA Fragmentation in Male Infertility: A Global Survey, Current Guidelines, and Expert Recommendations
Source: PubMed Central journal article supplement — World J Mens Health. 2023 Apr 20;41(4):809–47. doi: 10.5534/wjmh.230008 (PMC10523126; doi:10.5534/wjmh.230008), 2023-04-20
Supplement: wjmh-41-809-s001.pdf [file wjmh-41-809-s001.pdf]

## Supplement File 1. Raw data on management of elevated SDF (Q33–60)

### Section 4: Treatment of elevated SDF

**Q33. How do you treat elevated SDF once diagnosed in infertile men? [Select all that apply]**

|                                                                    |      |        |
|--------------------------------------------------------------------|------|--------|
| Recommend lifestyle changes (smoking cessation, weight loss, etc.) | 318  | 79.10% |
| Prescribe empiric antioxidants                                     | 309  | 76.87% |
| Recommend reduced ejaculatory abstinence                           | 154  | 38.31% |
| Refer directly for ART with advanced sperm selection techniques    | 83   | 20.65% |
| Repeat testing and confirm elevated SDF                            | 68   | 16.92% |
| Refer directly for ICSI with testicular sperm                      | 66   | 16.42% |
| Prescribe empiric hormonal therapy                                 | 31   | 7.71%  |
| Prescribe empiric antibiotics (without culture)                    | 28   | 6.97%  |
| Refer directly for ART with ejaculated sperm                       | 26   | 6.47%  |
| Not applicable                                                     | 37   | 9.20%  |
| Total                                                              | 1120 |        |

**Q34. What duration of abstinence do you recommend for infertile men with elevated SDF before attempting conception (whether natural or by ART)?**

|                                       |     |         |
|---------------------------------------|-----|---------|
| Less than 24 hours                    | 51  | 12.70%  |
| 24-48 hours                           | 135 | 33.60%  |
| 3-5 days                              | 125 | 31.10%  |
| 6 days or more                        | 7   | 1.70%   |
| I do not recommend reduced abstinence | 40  | 10.00%  |
| Not applicable                        | 44  | 10.90%  |
| Total                                 | 402 | 100.00% |

**Q35. At which point would you refer a man with UMI and high SDF for ART, given there is no female factor infertility and the woman is under 35 years old?**

|                                                                                                            |     |         |
|------------------------------------------------------------------------------------------------------------|-----|---------|
| Immediately after diagnosis                                                                                | 33  | 8.20%   |
| 3 months after failure of empiric medical therapy (e.g.: antioxidants) and conservative measures           | 97  | 24.20%  |
| 6 months after failure of empiric medical therapy (e.g.: antioxidants) and conservative measures           | 153 | 38.20%  |
| More than 6 months after failure of empiric medical therapy (e.g.: antioxidants) and conservative measures | 58  | 14.50%  |
| I do not refer men with UMI and elevated SDF for ART                                                       | 19  | 4.70%   |
| Not applicable                                                                                             | 41  | 10.20%  |
| Total                                                                                                      | 401 | 100.00% |

**Q36. At which point would you refer a man with IMI and high SDF for ART, given there is no female factor infertility and the woman is under 35 years old?**

|                                                                                                            |     |         |
|------------------------------------------------------------------------------------------------------------|-----|---------|
| Immediately after diagnosis                                                                                | 50  | 12.50%  |
| 3 months after failure of empiric medical therapy (e.g.: antioxidants) and conservative measures           | 100 | 25.00%  |
| 6 months after failure of empiric medical therapy (e.g.: antioxidants) and conservative measures           | 142 | 35.50%  |
| More than 6 months after failure of empiric medical therapy (e.g.: antioxidants) and conservative measures | 52  | 13.00%  |
| I do not refer men with IMI and elevated SDF for ART                                                       | 16  | 4.00%   |
| Not applicable                                                                                             | 40  | 10.00%  |
| Total                                                                                                      | 400 | 100.00% |

**Q37. Which of the following would you recommend for a couple experiencing natural RPL, with a normal female partner and a male partner with high SDF, as an initial approach? [Select all that apply]**

|                                                         |      |        |
|---------------------------------------------------------|------|--------|
| Lifestyle modification and avoiding environmental risks | 317  | 78.86% |
| Empiric antioxidants                                    | 308  | 76.62% |
| Reduced Abstinence                                      | 167  | 41.54% |
| ICSI with testicular sperm                              | 86   | 21.39% |
| ART                                                     | 78   | 19.40% |
| Empiric hormonal therapy                                | 44   | 10.95% |
| Empiric antibiotic therapy                              | 35   | 8.71%  |
| Not applicable                                          | 37   | 9.20%  |
| Total                                                   | 1072 |        |

**Q38. At which point would you refer a couple with natural RPL and high SDF in the man for ART, given there is no female factor infertility and the woman is under 35 years old?**

|                                                                                                            |     |         |
|------------------------------------------------------------------------------------------------------------|-----|---------|
| Immediately after diagnosis                                                                                | 54  | 13.50%  |
| 3 months after failure of empiric medical therapy (e.g.: antioxidants) and conservative measures           | 95  | 23.80%  |
| 6 months after failure of empiric medical therapy (e.g.: antioxidants) and conservative measures           | 136 | 34.10%  |
| More than 6 months after failure of empiric medical therapy (e.g.: antioxidants) and conservative measures | 47  | 11.80%  |
| I do not refer men with RPL and elevated SDF for ART                                                       | 23  | 5.80%   |
| Not applicable                                                                                             | 44  | 11.00%  |
| Total                                                                                                      | 399 | 100.00% |

**Q39. Which of the following would you recommend for a man with clinical varicocele, normal semen parameters, and high SDF, as an initial approach? [Select all that apply]**

|                                                                                   |      |        |
|-----------------------------------------------------------------------------------|------|--------|
| Antioxidants                                                                      | 254  | 63.34% |
| Avoiding lifestyle and environmental risks                                        | 235  | 58.60% |
| Varicocele repair (only if female partner is <38 years with good ovarian reserve) | 157  | 39.15% |
| Varicocele repair (regardless of female factors)                                  | 133  | 33.17% |
| Reduced Abstinence                                                                | 128  | 31.92% |
| Directly proceed to ART (if female partner is >38 years)                          | 78   | 19.45% |
| Not applicable                                                                    | 36   | 8.98%  |
| Empiric hormonal therapy                                                          | 35   | 8.73%  |
| Directly proceed to ART (regardless of female factors)                            | 27   | 6.73%  |
| Total                                                                             | 1083 |        |

**Q40. At which point do you perform varicocele repair for a man with clinical varicocele, normal semen parameters, and elevated SDF?**

|                                                                                                                |     |         |
|----------------------------------------------------------------------------------------------------------------|-----|---------|
| Immediately after diagnosis                                                                                    | 125 | 31.40%  |
| 3 months after failure of empiric medical therapy (e.g.: antioxidants) and conservative measures               | 61  | 15.30%  |
| 6 months after failure of empiric medical therapy (e.g.: antioxidants) and conservative measures               | 76  | 19.10%  |
| More than 6 months after failure of empiric medical therapy (e.g.: antioxidants) and conservative measures     | 26  | 6.50%   |
| After failure of ART and no female factor                                                                      | 36  | 9.00%   |
| I do not perform varicocele repair for men with clinical varicocele, normal semen parameters, and elevated SDF | 37  | 9.30%   |
| Not applicable                                                                                                 | 37  | 9.30%   |
| Total                                                                                                          | 398 | 100.00% |

**Q41. At which point would you refer a man with clinical varicocele, normal semen parameters, and high SDF for ART, given there is no female factor infertility and the woman is under 35 years old?**

|                                                                                                |     |         |
|------------------------------------------------------------------------------------------------|-----|---------|
| After failure of varicocele repair                                                             | 198 | 49.50%  |
| After failure of conservative measures (without varicocele repair)                             | 73  | 18.30%  |
| Immediately after diagnosis                                                                    | 62  | 15.50%  |
| I do not refer men with clinical varicocele, normal semen parameters, and elevated SDF for ART | 31  | 7.70%   |
| Not applicable                                                                                 | 36  | 9.00%   |
| Total                                                                                          | 400 | 100.00% |

**Q42. During the evaluation of an infertile man, he is found to have elevated SDF as well as subclinical varicocele, would you offer varicocele repair for this patient?**

|                                                                              |     |         |
|------------------------------------------------------------------------------|-----|---------|
| No, I do not repair subclinical varicocele                                   | 185 | 46.20%  |
| Yes, only if there are no other underlying causes and risks for elevated SDF | 132 | 33.00%  |
| Yes, in all such cases                                                       | 31  | 7.70%   |
| Yes, only if ART is planned                                                  | 20  | 5.00%   |
| Not applicable                                                               | 32  | 8.00%   |
| Total                                                                        | 400 | 100.00% |

**Q43. Do you prescribe antioxidants for infertile men with elevated SDF?**

|                                                                         |     |         |
|-------------------------------------------------------------------------|-----|---------|
| Yes, always                                                             | 199 | 49.70%  |
| Yes, depending on the associated underlying causes and risk factors     | 154 | 38.50%  |
| No, I do not prescribe antioxidants for infertile men with elevated SDF | 15  | 3.70%   |
| Not applicable                                                          | 32  | 8.00%   |
| Total                                                                   | 400 | 100.00% |

**Q44. For which of the following conditions associated with elevated SDF do you prescribe antioxidants as a primary line of therapy? [Select all that apply]**

|                                         |      |        |
|-----------------------------------------|------|--------|
| Smoking                                 | 315  | 78.55% |
| Exposures (occupational, environmental) | 283  | 70.57% |
| Obesity                                 | 256  | 63.84% |
| Aging                                   | 248  | 61.85% |
| UMI                                     | 223  | 55.61% |
| IMI                                     | 214  | 53.37% |
| RPL, no other causes found              | 205  | 51.12% |
| Clinical varicocele                     | 199  | 49.63% |
| Subclinical varicocele                  | 181  | 45.14% |
| ART failure                             | 180  | 44.89% |
| Male genital tract infections           | 159  | 39.65% |
| Leukocytospermia                        | 145  | 36.16% |
| Spinal cord injury                      | 73   | 18.20% |
| None                                    | 12   | 2.99%  |
| Not applicable                          | 36   | 8.98%  |
| Total                                   | 2729 |        |

**Q45. Which of the following antioxidants (either as single agents or as a combination) do you prescribe for infertile with elevated SDF? [Select all that apply]**

|                           |      |        |
|---------------------------|------|--------|
| Co-enzyme Q10             | 287  | 71.39% |
| Zinc                      | 286  | 71.14% |
| L-carnitine               | 285  | 70.90% |
| Selenium                  | 248  | 61.69% |
| Vitamin E                 | 233  | 57.96% |
| Vitamin C                 | 204  | 50.75% |
| L-arginine                | 189  | 47.01% |
| Acetyl carnitine          | 182  | 45.27% |
| Folic Acid (B9)           | 170  | 42.29% |
| Glutathione               | 155  | 38.56% |
| N-acetyl cysteine         | 141  | 35.07% |
| Lycopene                  | 137  | 34.08% |
| Vitamin D                 | 107  | 26.62% |
| Vitamin A                 | 95   | 23.63% |
| Other B vitamins          | 84   | 20.90% |
| Herbal products           | 58   | 14.43% |
| Docosahexanoic acid (DHA) | 47   | 11.69% |
| Melatonin                 | 25   | 6.22%  |
| Other                     | 24   | 5.97%  |
| Not applicable            | 47   | 11.69% |
| Total                     | 3004 |        |

**Q46. What duration of treatment with antioxidants do you recommend for infertile men with elevated SDF?**

|                                      |     |         |
|--------------------------------------|-----|---------|
| Less than 3 months                   | 4   | 1.00%   |
| 3 months                             | 153 | 38.10%  |
| 4-6 months                           | 158 | 39.30%  |
| 7-12 months                          | 19  | 4.70%   |
| Until clinical pregnancy is achieved | 30  | 7.50%   |
| Not applicable                       | 38  | 9.50%   |
| Total                                | 402 | 100.00% |

**Q47. How do you follow up on treatment success after antioxidant supplementation in infertile men with elevated SDF?**

|                                                |     |         |
|------------------------------------------------|-----|---------|
| Demonstration of reduced SDF on repeat testing | 232 | 57.70%  |
| Clinical pregnancy                             | 75  | 18.70%  |
| Live birth                                     | 30  | 7.50%   |
| I do not follow-up                             | 20  | 5.00%   |
| Not applicable                                 | 45  | 11.20%  |
| Total                                          | 402 | 100.00% |

**Q48. Do you prescribe hormones for infertile men with elevated SDF?**

|                                                                     |     |         |
|---------------------------------------------------------------------|-----|---------|
| No, I do not prescribe hormones for infertile men with elevated SDF | 197 | 49.40%  |
| Yes, depending on the associated underlying causes and risk factors | 138 | 34.60%  |
| Yes, always                                                         | 9   | 2.30%   |
| Not applicable                                                      | 55  | 13.80%  |
| Total                                                               | 399 | 100.00% |

**Q49. Which hormones do you prescribe for infertile men with elevated SDF? [Select all that apply]**

|                                                                                      |     |        |
|--------------------------------------------------------------------------------------|-----|--------|
| Follicle stimulating hormone (FSH)                                                   | 87  | 21.80% |
| Selective estrogen receptor modulators (SERM), such as clomiphene citrate, tamoxifen | 81  | 20.30% |
| Human chorionic gonadotropin (hCG)                                                   | 63  | 15.80% |
| Aromatase inhibitors, such as letrozole, anastrozole, testolactone                   | 49  | 12.30% |
| Gonadotropin releasing hormone (GnRH)                                                | 19  | 4.80%  |
| Other                                                                                | 6   | 1.50%  |
| Not applicable                                                                       | 253 | 63.40% |
| Total                                                                                | 558 |        |

**Q50. What duration of treatment with hormones do you recommend for infertile men with elevated SDF?**

|                                      |     |         |
|--------------------------------------|-----|---------|
| Less than 3 months                   | 7   | 1.70%   |
| 3 months                             | 63  | 15.70%  |
| 4-6 months                           | 80  | 20.00%  |
| 7-12 months                          | 6   | 1.50%   |
| Until clinical pregnancy is achieved | 6   | 1.50%   |
| Not applicable                       | 239 | 59.60%  |
| Total                                | 401 | 100.00% |

**Q51. In a couple with a normal female partner experiencing failure to achieve a clinical pregnancy after IUI, associated with elevated SDF in the male partner, what would your management strategy be?**

|                                                                                              |     |        |
|----------------------------------------------------------------------------------------------|-----|--------|
| Repeat the procedure after applying conservative measures (shorter abstinence, antioxidants) | 133 | 33.50% |
| Refer for ICSI using techniques to select sperm with lower SDF                               | 68  | 17.10% |
| Refer for ICSI with ejaculated sperm                                                         | 62  | 15.60% |
| Repeat IUI using techniques to select sperm with lower SDF                                   | 44  | 11.10% |
| Refer for ICSI using testicular sperm                                                        | 34  | 8.60%  |
| Repeat the procedure with no additional intervention                                         | 11  | 2.80%  |
| Not applicable                                                                               | 45  | 11.30% |
| Total                                                                                        | 397 | 100.00 |

**Q52. In a couple with a normal female partner experiencing miscarriage after IUI, associated with elevated SDF in the male partner, what would your management strategy be?**

|                                                                                              |     |         |
|----------------------------------------------------------------------------------------------|-----|---------|
| Repeat the procedure after applying conservative measures (shorter abstinence, antioxidants) | 115 | 28.90%  |
| Refer for ICSI using techniques to select sperm with lower SDF                               | 86  | 21.60%  |
| Repeat IUI using techniques to select sperm with lower SDF                                   | 56  | 14.10%  |
| Refer for ICSI with ejaculated sperm                                                         | 46  | 11.60%  |
| Refer for ICSI using testicular sperm                                                        | 38  | 9.50%   |
| Repeat the procedure with no additional intervention                                         | 12  | 3.00%   |
| Not applicable                                                                               | 45  | 11.30%  |
| Total                                                                                        | 398 | 100.00% |

**Q53. In a couple with a normal female partner experiencing fertilization failure after IVF, associated with elevated SDF in the male partner, what would your management strategy be?**

|                                                                                              |     |         |
|----------------------------------------------------------------------------------------------|-----|---------|
| Refer for ICSI using techniques to select sperm with lower SDF                               | 107 | 26.70%  |
| Repeat the procedure after applying conservative measures (shorter abstinence, antioxidants) | 73  | 18.20%  |
| Refer for ICSI using testicular sperm                                                        | 63  | 15.70%  |
| Refer for ICSI with ejaculated sperm                                                         | 61  | 15.20%  |
| Repeat IVF using techniques to select sperm with lower SDF                                   | 46  | 11.50%  |
| Repeat the procedure with no additional intervention                                         | 5   | 1.20%   |
| Not applicable                                                                               | 46  | 11.50%  |
| Total                                                                                        | 401 | 100.00% |

**Q54. In a couple with a normal female partner experiencing failure to achieve a clinical pregnancy after IVF, associated with elevated SDF in the male partner, what would your management strategy be?**

|                                                                                              |     |         |
|----------------------------------------------------------------------------------------------|-----|---------|
| Refer for ICSI using techniques to select sperm with lower SDF                               | 108 | 26.90%  |
| Repeat the procedure after applying conservative measures (shorter abstinence, antioxidants) | 74  | 18.50%  |
| Refer for ICSI using testicular sperm                                                        | 73  | 18.20%  |
| Refer for ICSI with ejaculated sperm                                                         | 52  | 13.00%  |
| Repeat IVF using techniques to select sperm with lower SDF                                   | 45  | 11.20%  |
| Repeat the procedure with no additional intervention                                         | 5   | 1.20%   |
| Not applicable                                                                               | 44  | 11.00%  |
| Total                                                                                        | 401 | 100.00% |

**Q55. In a couple with a normal female partner experiencing miscarriage after IVF or ICSI, associated with elevated SDF in the male partner and no other abnormality, what would your management strategy be?**

|                                                                                              |     |         |
|----------------------------------------------------------------------------------------------|-----|---------|
| Repeat IVF or ICSI using techniques to select sperm with lower SDF                           | 128 | 32.00%  |
| Refer for ICSI using testicular sperm                                                        | 118 | 29.50%  |
| Repeat the procedure after applying conservative measures (shorter abstinence, antioxidants) | 92  | 23.00%  |
| Repeat the procedure with no additional intervention                                         | 11  | 2.70%   |
| Transfer to another center                                                                   | 5   | 1.30%   |
| Not applicable                                                                               | 46  | 11.50%  |
| Total                                                                                        | 400 | 100.00% |

**Q56. Do you recommend sperm selection techniques for infertile men with elevated SDF?**

|                                                                                  |     |         |
|----------------------------------------------------------------------------------|-----|---------|
| Yes, only for repeat ART after initial failure with male partner having high SDF | 172 | 43.10%  |
| Yes, always if the couple is planned for ART with male partner having high SDF   | 129 | 32.30%  |
| No, I do not recommend sperm selection techniques                                | 98  | 24.60%  |
| Total                                                                            | 399 | 100.00% |



**Q57. Which sperm selection techniques do you use or recommend for men with elevated SDF?  
[Select all that apply]**

|                                                                  |     |        |
|------------------------------------------------------------------|-----|--------|
| Intracytoplasmic morphologically selected sperm injection (IMSI) | 110 | 27.43% |
| Physiological intracytoplasmic sperm injection (P-ICSI)          | 96  | 23.94% |
| Density gradient centrifugation (DGC)                            | 89  | 22.19% |
| Magnetic-activated cell sorting (MACS)                           | 51  | 12.72% |
| Microfluidics                                                    | 51  | 12.72% |
| Other                                                            | 20  | 4.99%  |
| Not applicable                                                   | 138 | 34.41% |
| Total                                                            | 555 |        |

**Q58. Do you recommend the use of testicular sperm for men with elevated SDF undergoing ICSI?**

|                                                                             |     |         |
|-----------------------------------------------------------------------------|-----|---------|
| Yes, only in some cases                                                     | 234 | 58.20%  |
| No, I do not recommend testicular sperm for infertile men with elevated SDF | 76  | 18.90%  |
| Yes, routinely                                                              | 37  | 9.20%   |
| Not applicable                                                              | 55  | 13.70%  |
| Total                                                                       | 402 | 100.00% |

**Q59. If you answered yes, when would you recommend testicular sperm for ICSI for men with elevated SDF?**

|                                                                          |     |         |
|--------------------------------------------------------------------------|-----|---------|
| After two or more ICSI failures with sperm selection                     | 149 | 38.50%  |
| After failure of one ICSI cycle                                          | 89  | 23.00%  |
| At first planned ICSI                                                    | 27  | 7.00%   |
| I do not recommend testicular sperm extraction for men with elevated SDF | 14  | 3.60%   |
| Not applicable                                                           | 108 | 27.90%  |
| Total                                                                    | 387 | 100.00% |

**Q60. If you answered no, why do you not recommend testicular sperm for men with elevated SDF? [Select all that apply]**

|                                                |     |        |
|------------------------------------------------|-----|--------|
| Inadequate evidence to support such a decision | 68  | 19.94% |
| Invasive procedure                             | 57  | 16.72% |
| Possible surgical complications                | 34  | 9.97%  |
| Risk of formation of antisperm antibodies      | 31  | 9.09%  |
| Expensive                                      | 22  | 6.45%  |
| Not applicable                                 | 233 | 68.33% |
| Total                                          | 445 |        |
