# Supplementary material for: Controversy and Consensus on the Management of Elevated Sperm DNA Fragmentation in Male Infertility: A Global Survey, Current Guidelines, and Expert Recommendations
Source: PubMed Central journal article supplement — World J Mens Health. 2023 Apr 20;41(4):809–47. doi: 10.5534/wjmh.230008 (PMC10523126; doi:10.5534/wjmh.230008), 2023-04-20
Supplement: wjmh-41-809-s005.pdf [file wjmh-41-809-s005.pdf]

## Supplement File 5. Complete demographic data

Countries of the participants:

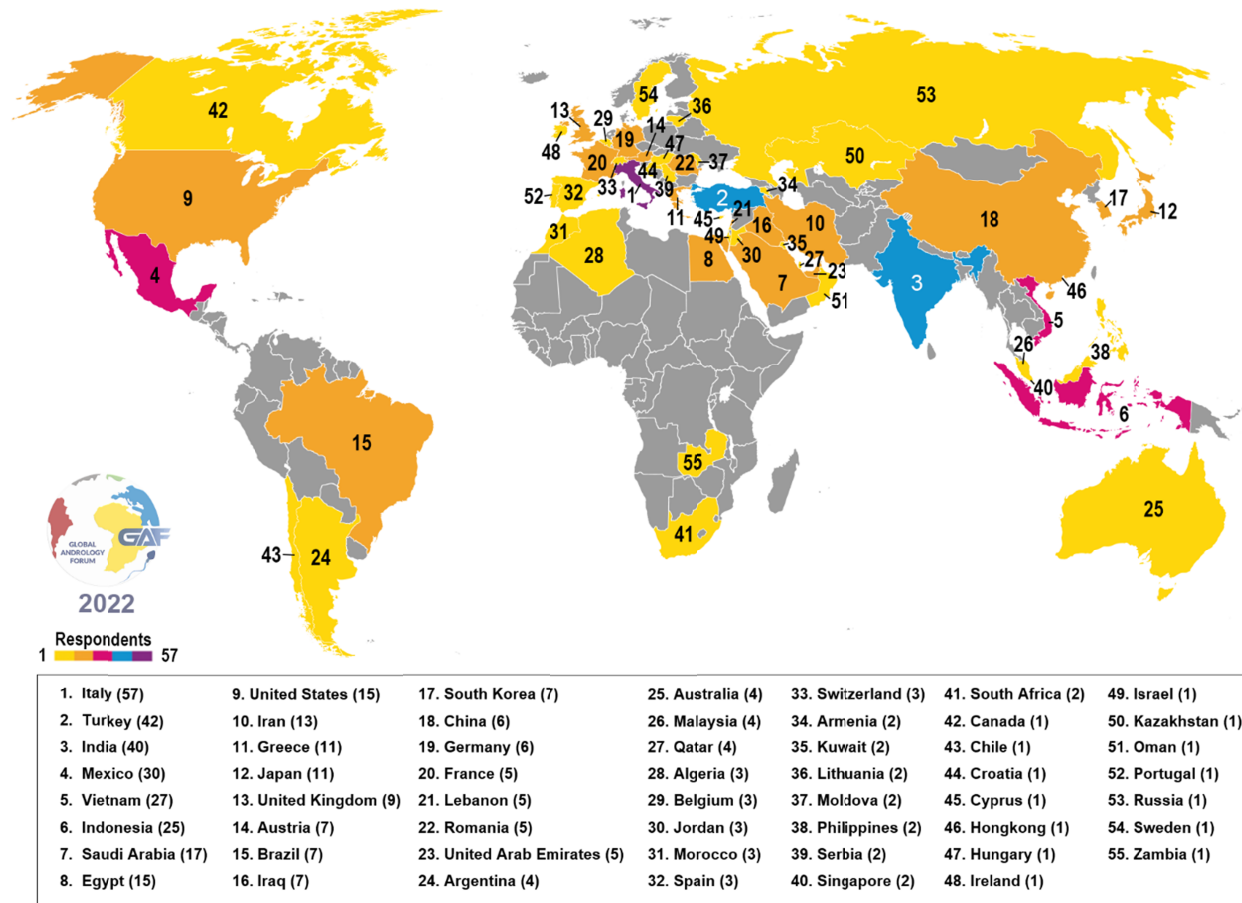

This figure represents the geographical distribution of respondents (total n=436). The number of respondents is shown in brackets after the name of each country. The purple color indicates the country with the greatest number of respondents (Italy; n=57), the blue color indicates the countries with the second and third highest responses (n=40 or above), the pink color indicates countries with responses between 20 and 30, the orange color represents those countries with 5-19 responses, while the yellow color indicates countries with less than 5 respondents.

The results of the other demographic questions are presented in the following table:

| Option                                                                          | N (%)             |
|---------------------------------------------------------------------------------|-------------------|
| <b>How old are you (years)?</b>                                                 |                   |
| 25-34                                                                           | 87 (20 %)         |
| 35-44                                                                           | 166 (38.1 %)      |
| 45-54                                                                           | 93 (21.3 %)       |
| 55-64                                                                           | 62 (14.2 %)       |
| >65                                                                             | 28 (6.4 %)        |
| <b>Total</b>                                                                    | <b>436 (100%)</b> |
| <b>What is the nature of your employment?</b>                                   |                   |
| Physician, attending                                                            | 275 (63.2 %)      |
| Physician, fellow                                                               | 22 (5.1 %)        |
| Physician, resident                                                             | 30 (6.9 %)        |
| Advanced practice provider (Physician Assistant, Nurse Practitioner)            | 5 (1.1 %)         |
| Reproductive Biologist/Embryologist                                             | 51 (11.7 %)       |
| Researcher (Full-time)                                                          | 24 (5.5 %)        |
| Other                                                                           | 28 (6.4 %)        |
| <b>Total</b>                                                                    | <b>435 (100%)</b> |
| <b>What is your area of specialization (as it relates to male infertility)?</b> |                   |
| Fellowship-trained reproductive urology                                         | 78 (17.9 %)       |
| General urology                                                                 | 97 (22.2 %)       |
| Gynecology                                                                      | 23 (5.3 %)        |
| Endocrinology                                                                   | 24 (5.5 %)        |
| Clinical andrologist                                                            | 87 (20 %)         |
| Clinical Laboratory                                                             | 7 (1.6 %)         |
| Embryology/Biology                                                              | 39 (8.9 %)        |
| ART specialist                                                                  | 70 (16.1 %)       |
| Primary care                                                                    | 1 (0.2 %)         |
| Other                                                                           | 10 (2.3 %)        |
| <b>Total</b>                                                                    | <b>436 (100%)</b> |
| <b>What is your practice setting?</b>                                           |                   |
| Academic                                                                        | 148 (33.9 %)      |
| Public                                                                          | 70 (16.1 %)       |
| Private                                                                         | 136 (31.2 %)      |
| Multiple                                                                        | 81 (18.6 %)       |
| Other                                                                           | 1 (0.2 %)         |
| <b>Total</b>                                                                    | <b>436 (100%)</b> |
| <b>How many years have you been practicing (related to male infertility)?</b>   |                   |
| Less than 2 years                                                               | 43 (9.9 %)        |
| 2-5 years                                                                       | 90 (20.7 %)       |
| 6-10 years                                                                      | 85 (19.6 %)       |
| 11-15 years                                                                     | 63 (14.5 %)       |
| More than 15 years                                                              | 153 (35.3 %)      |
| <b>Total</b>                                                                    | <b>434 (100%)</b> |

| <b>On average, how many infertile couples do you manage per week?</b>                                                |                   |
|----------------------------------------------------------------------------------------------------------------------|-------------------|
| <10                                                                                                                  | 140 (32.6 %)      |
| 11-20                                                                                                                | 124 (28.8 %)      |
| 21-30                                                                                                                | 70 (16.3 %)       |
| 31-40                                                                                                                | 35 (8.1 %)        |
| 41-50                                                                                                                | 13 (3 %)          |
| >50                                                                                                                  | 48 (11.2 %)       |
| <b>Total</b>                                                                                                         | <b>430 (100%)</b> |
| <b>How many IVF/ICSI full cycles (= oocyte pickup) are performed in one year at your center by your entire team?</b> |                   |
| <100                                                                                                                 | 65 (15.1 %)       |
| 101-400                                                                                                              | 99 (23 %)         |
| 401-800                                                                                                              | 59 (13.7 %)       |
| >800                                                                                                                 | 72 (16.7 %)       |
| I refer my IVF/ICSI couples to another center                                                                        | 84 (19.5 %)       |
| Not applicable                                                                                                       | 52 (12.1 %)       |
| <b>Total</b>                                                                                                         | <b>431 (100%)</b> |
| <b>What is the cost of SDF testing in your area?</b>                                                                 |                   |
| Less than \$50                                                                                                       | 68 (16 %)         |
| \$50-100                                                                                                             | 141 (33.1 %)      |
| \$100-200                                                                                                            | 132 (31 %)        |
| \$200-500                                                                                                            | 62 (14.6 %)       |
| \$500-1000                                                                                                           | 15 (3.5 %)        |
| More than \$1000                                                                                                     | 8 (1.9 %)         |
| <b>Total</b>                                                                                                         | <b>426 (100%)</b> |

Abbreviations: ART: assisted reproductive technology; IVF: *in-vitro* fertilization; ICSI: intracytoplasmic sperm injection; SDF: sperm DNA fragmentation.
